# Supplementary material
Source: PubMed Central journal article supplement (PMC1691193)
Supplement: 12573074s01.pdf [file 12573074s01.pdf]

This is an electronic appendix to the paper by Schmid *et al.* 2002 Scaling in stream communities. *Proc. R. Soc. Lond. B* **269**, 2587—2594.

Electronic appendices are refereed with the text. However, no attempt has been made to impose a uniform editorial style on the electronic appendices.

Appendix A. Sampling protocol to estimate mean seasonal population densities in the streambed sediments of two geographically separate streams, the Seebach (SB) and Mynach (MY). H, the number of Hess; FC, the number of Freeze-Core samples with prior electropositioning; *S*, the number of species found in each season and period; *S<sub>T</sub>*, the total number of species found in a season.

| <b>Stream</b> | <b>Sampling period</b> | <b>Season</b> | <b>H</b> | <b>FC</b> | <b>S</b> | <b>S<sub>T</sub></b> |
|---------------|------------------------|---------------|----------|-----------|----------|----------------------|
| SB            | 1991/1992              | AU            | 40       | -         | 362      |                      |
|               | 1993/1994              |               | 10       | 10        | 313      | 385                  |
|               | 1991/1992              | WI            | 45       | -         | 343      |                      |
|               | 1993/1994              |               | 41       | 10        | 345      | 375                  |
|               | 1991/1992              | SP            | 45       | -         | 345      |                      |
|               | 1993/1994              |               | 40       | 5         | 367      | 397                  |
|               | 1991/1992              | SU            | 45       | -         | 356      |                      |
|               | 1993/1994              |               | 15       | 5         | 340      | 389                  |
| MY            | 1993/1994              | AU            | 12       | 10        | 240      |                      |
|               | 1996/1997              |               | 60       | -         | 180      | 249                  |
|               | 1993/1994              | WI            | 18       | 10        | 165      |                      |
|               | 1996/1997              |               | 60       | -         | 136      | 187                  |
|               | 1993/1994              | SP            | 8        | 5         | 149      |                      |
|               | 1996/1997              |               | 60       | -         | 222      | 243                  |
|               | 1993/1994              | SU            | 8        | 5         | 184      |                      |
|               | 1996/1997              |               | 60       | -         | 182      | 227                  |
